# Supplementary material for: Genome-wide identification and characterization of the Hsp70 gene family in allopolyploid rapeseed (Brassica napus L.) compared with its diploid progenitors
Source: PeerJ. 2019 Aug 20;7:e7511. doi: 10.7717/peerj.7511 (PMC6707343; doi:10.7717/peerj.7511)
Supplement: Table S1 — All 29 BrHsp70 genes and 20 BoHsp70 genes were identified using BLASTp program (BRAD; http://Brassicadb.org/brad/) and HMM-based research (http://hmmer.org/). Details about BrHsp70 and BoHsp70 genes and the physicochemical parameters of each BrHsp70 and BoHsp70 proteins were displayed. [file peerj-07-7511-s003.xlsx]

## Sheet: B. rapa
Table S1 The Hsp70 gene family information in Brassica rapa
Gene name	Gene ID	Chromosome	Gene position		Intron number	Mature protein					Arabidopsis orthologue locus
			start	end		Protein Length(aaa)	bMw(cKD)	dGRAVY	Instability index	epI
BrHsp70-2a	Bra009583	A10	16115900	16118175	2	602	65.82	-0.383	33.91	4.89	AT5G02500
BrHsp70-2b	Bra035909	A09	3556883	3559021	2	572	62.82	-0.41	39.34	5.09	AT5G02500
BrHsp70-2c	Bra024699	A09	24658241	24660418	1	584	63.64	-0.427	33.27	4.96	AT5G02500
BrHsp70-2d	Bra035470	A01	15751076	15753302	2	596	64.92	-0.414	33.96	5.02	AT5G02500
BrHsp70-2e	Bra013046	A03	20818744	20820956	2	546	59.53	-0.453	33.34	4.95	AT5G02500
BrHsp70-2f	Bra009584	A10	16126489	16128552	2	553	61.03	-0.47	38.4	5.07	AT5G02500
BrHsp70-4a	Bra038734	A01	24262317	24264954	1	650	71.27	-0.429	32.26	5.13	AT3G12580
BrHsp70-4b	Bra001457	A03	16474528	16476872	1	588	64.08	-0.445	31.1	4.98	AT3G12580
BrHsp70-5a	Bra026084	A06	5912047	5913990	0	647	71.04	-0.408	35.51	5.48	AT1G16030
BrHsp70-5b	Bra016644	A08	18631588	18633540	0	650	71.34	-0.434	35.47	5.28	AT1G16030
BrHsp70-6a	Bra010498	A08	14055269	14058075	7	717	76.42	-0.313	28.52	5.14	AT4G24280
BrHsp70-6b	Bra013786	A01	7756398	7759202	7	711	76.11	-0.316	31.48	5.09	AT4G24280
BrHsp70-6c	Bra019231	A03	25624298	25627186	7	710	75.95	-0.328	27.71	5.32	AT4G24280
BrHsp70-6d	Bra013788	A01	7761911	7764036	4	534	56.77	-0.288	39.65	5.68	AT4G24280
BrHsp70-8	Bra005610	A05	6518617	6520311	0	564	60.82	0.051	41.55	5.39	AT2G32120
BrHsp70-9a	Bra011794	A01	476945	479384	4	682	73.01	-0.306	38.26	5.56	AT4G37910
BrHsp70-9b	Bra010620	A08	14838516	14840948	4	676	72.48	-0.288	37.65	5.79	AT4G37910
BrHsp70-10a	Bra028628	A02	1401123	1404455	5	680	72.87	-0.335	34.42	5.82	AT5G09590
BrHsp70-10b	Bra006027	A03	1661589	1664423	4	681	72.68	-0.336	33.94	5.55	AT5G09590
BrHsp70-11	Bra022819	A03	7255705	7258415	5	669	73.67	-0.48	27.5	5.11	AT5G28540
BrHsp70-12a	Bra015047	A07	6193591	6195966	4	666	73.4	-0.464	29.78	5.52	AT5G42020
BrHsp70-12b	Bra028521	A07	14535838	14540941	4	665	73.49	-0.478	30.02	5.08	AT5G42020
BrHsp70-12c	Bra023110	A03	8746392	8748916	4	642	70.69	-0.406	27.43	4.97	AT5G42020
BrHsp70-13	Bra031657	A09	37121948	37124646	4	673	75.07	-0.415	33.1	4.93	AT1G09080
BrHsp70-15a	Bra039679	A06	579377	582552	8	818	90.3	-0.402	39.54	5.17	AT1G79930
BrHsp70-15b	Bra014713	A04	2466625	2469795	8	814	90	-0.417	42.01	5.2	AT1G79930
BrHsp70-16	Bra019840	A06	4073424	4076750	8	761	84.55	-0.493	47.68	5.73	AT1G11660
BrHsp70-17a	Bra012696	A03	22715409	22719277	13	869	96.78	-0.484	43.25	5.9	AT4G16660
BrHsp70-17b	Bra038496	A01	10655146	10659033	9	846	94.23	-0.457	45.5	5.99	AT4G16660
					aaa: amino acids, bMw: molecular weight, ckD: kilo Dalton, dGRAVY: grand average of hydropathy, epI: isoelectric point

## Sheet: B. oleracea
Table S1 The Hsp70 gene family information in Brassica oleracea
Gene name	Gene ID	Chromosome	Gene position		Intron number	Mature protein					Arabidopsis orthologue locus
			start	end		Protein Length(aaa)	bMw(cKD)	dGRAVY	Instability index	epI
BoHsp70-2a	Bol004513	Scaffold000321	232536	234641	1	646	70.81	-0.404	36.94	5.1	AT5G02500
BoHsp70-2b	Bol010107	C09	40084454	40086698	1	646	70.73	-0.374	34.64	5.13	AT5G02500
BoHsp70-2c	Bol042689	C03	28794974	28797119	1	650	71.17	-0.416	34.84	5.05	AT5G02500
BoHsp70-2d	Bol023703	Scaffold000098	1124748	1126981	1	649	71.03	-0.412	35.73	5.05	AT5G02500
BoHsp70-4	Bol035474	C03	20734326	20736907	1	650	71.27	-0.436	32.06	5.17	AT3G12580
BoHsp70-5a	Bol029263	C08	19702194	19704146	0	650	71.43	-0.441	36.17	5.28	AT1G16030
BoHsp70-5b	Bol038191	C05	6228018	6229961	0	647	71.09	-0.419	35.79	5.43	AT1G16030
BoHsp70-7	Bol010193	C08	15173900	15176640	7	621	66.85	-0.377	29.7	4.85	AT5G49910
BoHsp70-8	Bol014092	C04	34493683	34495374	0	563	60.55	0.069	41.18	5.38	AT2G32120
BoHsp70-9a	Bol028880	C01	562341	564781	4	682	73.05	-0.303	39.38	5.73	AT4G37910
BoHsp70-9b	Bol032741	C03	46971343	46973327	1	613	65.82	-0.342	36.23	5.29	AT4G37910
BoHsp70-10	Bol008782	C03	1754459	1757661	4	681	72.74	-0.326	32.9	5.55	AT5G09590
BoHsp70-12a	Bol013948	C07	3153526	3155914	4	668	73.53	-0.468	27.73	5.08	AT5G42020
BoHsp70-12b	Bol005557	C03	9545587	9548213	3	588	65.25	-0.54	28.93	5.15	AT5G42020
BoHsp70-13	Bol006580	C08	39804392	39806927	3	395	44.32	-0.526	34.15	4.73	AT1G09080
BoHsp70-15a	Bol044248	C04	22770286	22773448	8	814	90.07	-0.429	41.52	5.26	AT1G79930
BoHsp70-15b	Bol039105	C06	21268320	21273184	10	889	98.5	-0.449	41.26	5.44	AT1G79930
BoHsp70-16	Bol036636	C05	25075358	25078675	8	761	84.57	-0.48	47.83	5.68	AT1G11660
BoHsp70-17a	Bol037168	C07	38732353	38736223	13	869	96.98	-0.482	43.12	5.84	AT4G16660
BoHsp70-17b	Bol020201	Scaffold000124	117471	121225	13	833	92.99	-0.532	43.74	5.61	AT4G16660
					aaa: amino acids, bMw: molecular weight, ckD: kilo Dalton, dGRAVY: grand average of hydropathy, epI: isoelectric point
