# Supplementary material for: Genome-wide identification and characterization of the Hsp70 gene family in allopolyploid rapeseed (Brassica napus L.) compared with its diploid progenitors
Source: PeerJ. 2019 Aug 20;7:e7511. doi: 10.7717/peerj.7511 (PMC6707343; doi:10.7717/peerj.7511)
Supplement: Table S4 — All Hsp70 protein subcellular localization prediction was analyzed using the WoLF PSORT (http://www.genscript.com/psort/wolf_psort.html/) online tool. [file peerj-07-7511-s006.xlsx]

## Sheet: B. napus
Table S2 Subcellular Localization of BnHsp70 proteins
Protein name	WoLF PSORT
BnC.Hsp70-2	cyto:9,chlo:2,nucl:2,cysk:1
BnA.Hsp70-4a	cyto:8,cysk:4,chlo:1,nucl:1
BnC.Hsp70-4b	cyto:8,cysk:4,chlo:1,nucl:1
BnA.Hsp70-4c	cyto:9,cysk:4,chlo:1
BnC.Hsp70-4d	cyto:8,cysk:5,chlo:1
BnC.Hsp70-5a	cyto:10,chlo:2,nucl:1,cysk:1
BnA.Hsp70-5b	cyto：10,chlo:2,nucl:1,cysk:1
BnC.Hsp70-5c	cyto:10,chlo:3,nucl:1
BnA.Hsp70-5d	cyto:10,chlo:4
BnC.Hsp70-6a	chlo:14
BnC.Hsp70-6b	chlo:14
BnC.Hsp70-6c	chlo:14
BnC.Hsp70-6d	cyto:12,chlo:1,cysk:1
BnA.Hsp70-7a	cyto:10,mito:2,chlo:1,plas:1
BnA.Hsp70-7b	cyto:10,mito:2,chlo:1,plas:1
BnC.Hsp70-7c	cyto:10,mito:2,chlo:1,plas:1
BnA.Hsp70-7d	cyto:10,mito:2,chlo:1,plas:1
BnA.Hsp70-8a	cyto:9,chlo:3,nucl:1,cysk:1
BnC.Hsp70-8b	cyto:9,chlo:3,nucl:1,cysk:1
BnC.Hsp70-9a	mito:11,chlo:3
BnC.Hsp70-9b	mito:10,chlo:4
BnA.Hsp70-9c	mito:10,chlo:4
BnA.Hsp70-9d	mito:11,chlo:3
BnA.Hsp70-10a	mito:12,chlo:2
BnA.Hsp70-10b	mito:11,chlo:3
BnC.Hsp70-10c	mito:11,chlo:3
BnC.Hsp70-10d	chlo:8,mito:4,cyto:1.5,cyto_nucl:1.5
BnA.Hsp70-11a	E.R.:14
BnC.Hsp70-11b	E.R.:14
BnC.Hsp70-11c	E.R.:14
BnC.Hsp70-12a	E.R.:14
BnC.Hsp70-12b	E.R.:14
BnA.Hsp70-12c	E.R.:14
BnA.Hsp70-12d	E.R.:14
BnA.Hsp70-12e	E.R.:14
BnA.Hsp70-13a	cyto:9,cysk:4,chlo:1
BnC.Hsp70-13b	cyto:13,cysk:1
BnA.Hsp70-15a	cyto:6，nucl:4,chlo:2,plas:1,cysk:1
BnA.Hsp70-15b	extr:6,chlo:4,nucl:2,cyto:1,E.R.:1
BnC.Hsp70-15c	cyto:6,chlo:4,nucl:4
BnC.Hsp70-15d	chlo:6,plas:5,mito:3
BnC.Hsp70-16a	nucl:13,cysk:1
BnA.Hsp70-16b	nucl:12,vacu:1,cysk:1
BnA.Hsp70-17a	E.R.:14
BnC.Hsp70-17b	E.R.:14
BnC.Hsp70-17c	chlo:8,nucl:4,mito:1,pero:1
BnA.Hsp70-17d	chlo:7,nucl:5,mito:1,pero:1
WoLF PSORT prediction: chlo, chloroplast; cyto, cytosol; cysk, cytoskeleton;E.R., endoplasmic reticulum;extr, extracelular;mito, mitocondria;nucl, nucleus;plas, plasma membrane;pero,peroxisome;vacu,vacuolar membrane.

## Sheet: B. rapa
Table S2 Subcellular Localization of BrHsp70 proteins
Protein name	WoLF PSORT
BrHsp70-2a	cyto:8,cysk:5,chlo:1
BrHsp70-2b	cyto:10,cysk:3,chlo:1
BrHsp70-2c	cyto:8,cysk:3,chlo:2,nucl:1
BrHsp70-2d	cyto:10,cysk:3,chlo:1
BrHsp70-2e	cyto:8,cysk:5,chlo:1
BrHsp70-2f	cyto:7,cysk:6,chlo:1
BrHsp70-4a	cyto:8,cysk:4,chlo:1,nucl:1
BrHsp70-4b	cyto:8,cysk:4,chlo:1,nucl:1
BrHsp70-5a	cyto:13,chlo:1
BrHsp70-5b	cyto:10,chlo:2,nucl:1,cysk:1
BrHsp70-6a	chlo:14
BrHsp70-6b	chlo:14
BrHsp70-6c	chlo:14
BrHsp70-6d	chlo:7,mito:2,extr:2,vacu:2,nucl:1
BrHsp70-8	cyto:9,chlo:3,nucl:1,cysk:1
BrHsp70-9a	mito:10,chlo:4
BrHsp70-9b	mito:12,chlo:2
BrHsp70-10a	mito:11,chlo:3
BrHsp70-10b	mito:11,chlo:3
BrHsp70-11	E.R.:14
BrHsp70-12a	chlo:8,cyto:2, extr:2,E.R.:1,pero:1
BrHsp70-12b	E.R.:14
BrHsp70-12c	E.R.:14
BrHsp70-13	cyto:10,cysk:3,chlo:1
BrHsp70-15a	cyto:8,nucl:3,chlo:2,cysk:1
BrHsp70-15b	nucl:5,cyto:5,chlo:2,plas:1,cysk:1
BrHsp70-16	nucl:13,cysk:1
BrHsp70-17a	E.R.:14
BrHsp70-17b	vacu:8,chlo:2,cyto:1,mito:1,extr:1,golg:1
WoLF PSORT prediction: chlo, chloroplast; cyto, cytosol; cysk, cytoskeleton;E.R., endoplasmic reticulum;extr, extracelular;mito, mitocondria;nucl, nucleus;plas, plasma membrane;pero,peroxisome;vacu,vacuolar membrane.

## Sheet: B. oleracea
Table S2 Subcellular Localization of BoHs70 proteins
Protein name	WoLF PSPORT
BoHsp70-2a	cyto:9,cysk:4,chlo:1
BoHsp70-2b	cyto:9,cysk:4,chlo:1
BoHsp70-2c	cyto:8,cysk:4,chlo:1,nucl:1
BoHsp70-2d	cyto:8,cysk:4,chlo:1,nucl:1
BoHsp70-4	cyto:8,cysk:5,chlo:1
BoHsp70-5a	cyto:10,chlo:2,nucl:1,cysk:1
BoHsp70-5b	cyto:13,chlo:1
BoHsp70-7	cyto:11,mito:2,chlo:1
BoHsp70-8	cyto:9,chlo:3,nucl:1,cysk:1
BoHsp70-9a	mito:10,chlo:4
BoHsp70-9b	cyto:7,chlo:5,extr:1,cysk:1
BoHsp70-10	mito:11,chlo:3
BoHsp70-12a	E.R.:13,extr:1
BoHsp70-12b	E.R.:14
BoHsp70-13	cyto:7.5,cyto_nucl:4.5,E.R.:2,mito:1,plas:1,extr:1,vacu:1
BoHsp70-15a	cyto:6,nucl:5,chlo:1,plas:1,cysk:1
BoHsp70-15b	cyto:7,nucl:4,chlo:2,cysk:1
BoHsp70-16	nucl:13,cysk:1
BoHsp70-17a	E.R.:14
BoHsp70-17b	chlo:7,nucl:4,mito:2,pero:1
WoLF PSORT prediction: chlo, chloroplast; cyto, cytosol; cysk, cytoskeleton;E.R., endoplasmic reticulum;extr, extracelular;mito, mitocondria;nucl, nucleus;plas, plasma membrane;pero,peroxisome;vacu,vacuolar membrane.
