# Supplementary material for: Genome-wide identification and characterization of the Hsp70 gene family in allopolyploid rapeseed (Brassica napus L.) compared with its diploid progenitors
Source: PeerJ. 2019 Aug 20;7:e7511. doi: 10.7717/peerj.7511 (PMC6707343; doi:10.7717/peerj.7511)
Supplement: Table S5 — The Hsp70 specific domain was analyzed using the MEME tool (http://meme-suite.org/), and shown by the residues in bold within motifs. [file peerj-07-7511-s007.xlsx]

## Sheet: Sheet1
Table S3 Multilevel consensus sequences of MEME-derived motifs on Hsp70 protein
motif	width	best possible match
1	50	VKDAVVTVPAYFNDSQRQATKDAGVIAGLNVLRIINEPTAAAJAYGLDKK
2	38	MTKLIPRNTTIPTKKSQVFSTYADNQTGVLIQVYZGER
3	29	FDLVGIPPAPRGVPQIEVTFDIDANGILN
4	29	DLGGGTFDVSVLTIEEGVFEVKATAGDTH
5	50	TRARFEELNMDLFERCMTPVEKCLRDAGLSKSDVDEVVLVGGSTRIPKVQ
6	42	VIGIDLGTTYSCVGVWEGDRVEIIANDZGNRTTPSYVAFTDS
7	50	DFDNRLVBHFVSEFKRKHKKDJSKBKKALQRLREACERAKRELSSTAQTT
8	31	FFFGKEPCKGVNPDEAVAYGAAVQGAILSGE
9	50	TITNDKGRLSKDEIEKMVQEAEKYAKEDKEKKKKIDAKNALESYVYNMRN
10	31	ERLIGEAAKNQAAMNPENTVFDVKRLIGRRF
11	50	KEKIEDAIKEAJEWLDGNQLAEKDEFEEKLKELESVCNPIIAKMYQGGGG
12	29	YKGEGKQFSPEEISAMVLTKMKETAEAYL
13	21	VKDJLLLDVTPLSLGJETLGG
14	21	DPEVQKDMKLVPFKIVEGPGG
15	29	TQEIKAKMAALNKAVSKIGZSMYNGPGSG
16	50	ZDWLYEDGEDETKGEYVEKLEELKKIGDPIELRYKESQERPTAVEYLGKY
17	15	IEIESLFDGIDFYST
18	29	ELREKIPAEVAEEIETAVQELKDKIAGGD
19	11	ERTKDNKLLGK
20	50	GAENQQSTIVFPKGNPIPSVKALTFYRSGTFSVDVQYSDATDLQAPAKIS
