# Supplementary material for: Genome-wide identification and characterization of the Hsp70 gene family in allopolyploid rapeseed (Brassica napus L.) compared with its diploid progenitors
Source: PeerJ. 2019 Aug 20;7:e7511. doi: 10.7717/peerj.7511 (PMC6707343; doi:10.7717/peerj.7511)
Supplement: Table S6 — The Hsp70 genes of three fractionated subgenomes (LF, MF1 and MF2) were shown by searching ‘syntenic gene’ in BRAD database. [file peerj-07-7511-s008.xlsx]

## Sheet: Sheet1
Table S4 Syntenic gene analysis of Hsp70 genes in A. thaliana, B. rapa, B. oleracea and B. napus
Gene type	tPCK	Triplication Block	AGI ID	Br			Bo			BnA			BnC
	Chr			LF	MF1	MF2	LF	MF1	MF2	LF	MF1	MF2	LF	MF1	MF2
AtHsp70-1	tPCK5	R	AT5G02490	BrHsp70-2a(Bra009583)/BrHsp70-2f(Br009584)			BoHsp70-2b(Bol010107)
AtHsp70-2	tPCK5	R	AT5G02500
AtHsp70-3	tPCK2	F	AT3G09440
AtHsp70-4	tPCK2	F	AT3G12580		BrHsp70-4a(Bra038734)	BrHsp70-4b(Bra001457)			BoHsp70-4(Bol035474)		BnA.Hsp70-4a(BnaA01g30490D)	BnA.Hsp70-4c(BnaA03g32320D)		BnC.Hsp70-4b(BnaC01g38510D)	BnC.Hsp70-4d(BnaC03g37680D)
AtHsp70-5	tPCK1	A	AT1G16030	BrHsp70-5a(Bra026084)	BrHsp70-5b(Bra016644)		BoHsp70-5b(Bol038191)	BoHsp70-5a(Bol029263)		BnA.Hsp70-5d(BnaA06g10730D)	BnA.Hsp70-5b(BnaA08g23680D)		BnC.Hsp70-5c(BnaC05g12240D)	BnC.Hsp70-5a(BnaC08g16850D)
AtHsp70-6	tPCK4	U	AT4G24280	BrHsp70-6b(Bra013786)/BrHsp70-6d(Bra013788)	BrHsp70-6c(Bra019231)	BrHsp70-6a(Bra010498)			BoHsp70-7(Bol010193)	BnA.Hsp70-7a(BnaA01g13780D)	BnA.Hsp70-7d(BnaA03g46660D)	BnA.Hsp70-7b(BnaA08g14780D)	BnC.Hsp70-6a(BnaC01g16200D)/BnC.Hsp70-6c(BnaC01g16210D)/BnC.Hsp70-6d(BnaC01g16230D)	BnC.Hsp70-6b(BnaC07g38890D)
AtHsp70-7	tPCK5	Wb	AT5G49910
AtHsp70-8	tPCK3	J	AT2G32120	BrHsp70-8(Bra005610)		BrHsp70-11(Bra022819)	BoHsp70-8(Bol014092)					BnA.Hsp70-11a(BnaA03g14210D)	BnC.Hsp70-8b(BnaC04g12620D)		BnC.Hsp70-11b(BnaC03g17190D)
AtHsp70-9	tPCK4	U	AT4G37910	BrHsp70-9a(Bra011794)		BrHsp70-9b(Bra010620)	BoHsp70-9a(Bol028880)		BoHsp70-9b(Bol032741)	BnA.Hsp70-9c(BnaA01g00190D)		BnA.Hsp70-9d(BnaA08g15870D)	BnC.Hsp70-9b(BnaC01g01110D)		BnC.Hsp70-9a(BnaC03g61170D)
AtHsp70-10	tPCK5	R	AT5G09590		BrHsp70-10b(Bra006027)			BoHsp70-10(Bol008782)				BnA.Hsp70-10a(BnaA02g00030D)		BnC.Hsp70-10c(BnaC03g03860D)	BnC.Hsp70-10d(BnaC02g00800D)
AtHsp70-11	tPCK7	Q	AT5G28540
AtHsp70-12	tPCK4	S	AT5G42020		BrHsp70-12b(Bra028521)						BnA.Hsp70-12e(BnaA07g15650D)			BnC.Hsp70-12a(BnaC06g13860D)
AtHsp70-13	tPCK1	A	AT1G09080			BrHsp70-13(Bra031657)			BoHsp70-13(Bol006580)			BnA.Hsp70-13a(BnaA09g48560D)			BnC.Hsp70-13b(BnaC08g42820D)
AtHsp70-14	tPCK6	E	AT1G79920
AtHsp70-15	tPCK6	E	AT1G79930
AtHsp70-16	tPCK1	A	AT1G11660	BrHsp70-16(Bra019840)			BoHsp70-16(Bol036636)			BnA.Hsp70-16b(BnaA06g07260D)
AtHsp70-17	tPCK4	U	AT4G16660	BrHsp70-17b(Bra038496)	BrHsp70-17a(Bra012696)		BoHsp70-17b(Bol020201)	BoHsp70-17a(Bol037168)		BnA.Hsp70-17d(BnaA01g17140D)	BnA.Hsp70-17a(BnaA03g42810D)		BnC.Hsp70-17c(BnaC01g19960D)
AtHsp70-18	tPCK7	D	AT1G56410		BrHsp70-2d(Bra035470)
	tPCK: translocation Proto-Calepineae Karyotype (n=7)
