# Supplementary material for: Genome-wide identification and characterization of the Hsp70 gene family in allopolyploid rapeseed (Brassica napus L.) compared with its diploid progenitors
Source: PeerJ. 2019 Aug 20;7:e7511. doi: 10.7717/peerj.7511 (PMC6707343; doi:10.7717/peerj.7511)
Supplement: Table S7 — The non-synonymous (Ka) and synonymous (Ks) substitution ratios were calculated and the value of Ka/Ks ratio >1, =1 and <1 are represented for positive selection, neutral selection and negative or stabilizing selection, respectively. [file peerj-07-7511-s009.xlsx]

## Sheet: B. napus
Table S5 The Ka/Ks ratios for segmentally-duplicated BnHsp70 genes
Gene name	Gene name	ka	ks	ka/ks
BnA.Hsp70-4a	BnC.Hsp70-4b	0.001	0.242	0.004
BnA.Hsp70-4a	BnC.Hsp70-4d	0.01	0.924	0.011
BnA.Hsp70-4a	BnA.Hsp70-4c	0.011	0.961	0.011
BnC.Hsp70-4b	BnC.Hsp70-4d	0.007	0.873	0.008
BnC.Hsp70-4b	BnA.Hsp70-4c	0.008	0.885	0.009
BnC.Hsp70-4b	BnC.Hsp70-5a	0.112	1.277	0.088
BnA.Hsp70-4c	BnC.Hsp70-4d	0.003	0.214	0.014
BnC.Hsp70-5a	BnA.Hsp70-5b	0.006	0.231	0.026
BnC.Hsp70-5c	BnA.Hsp70-5d	0.005	0.195	0.026
BnC.Hsp70-6a	BnA.Hsp70-7a	0.004	0.214	0.019
BnC.Hsp70-6a	BnC.Hsp70-6b	0.03	0.482	0.062
BnC.Hsp70-6a	BnA.Hsp70-7d	0.017	0.477	0.036
BnC.Hsp70-6a	BnC.Hsp70-6c	0.071	0.384	0.185
BnC.Hsp70-6a	BnA.Hsp70-7b	0.026	0.479	0.054
BnC.Hsp70-6a	BnC.Hsp70-7c	0.021	0.535	0.039
BnC.Hsp70-6a	BnC.Hsp70-6d	0.126	0.37	0.341
BnC.Hsp70-6b	BnA.Hsp70-7d	0.004	0.121	0.033
BnC.Hsp70-6b	BnC.Hsp70-7c	0.012	0.514	0.023
BnC.Hsp70-6b	BnA.Hsp70-7a	0.015	0.482	0.031
BnC.Hsp70-6b	BnA.Hsp70-7b	0.011	0.505	0.022
BnC.Hsp70-6b	BnC.Hsp70-6c	0.082	0.573	0.143
BnC.Hsp70-6c	BnA.Hsp70-7a	0.065	0.404	0.161
BnC.Hsp70-6c	BnA.Hsp70-7b	0.065	0.474	0.137
BnC.Hsp70-6c	BnC.Hsp70-7c	0.063	0.49	0.129
BnC.Hsp70-6c	BnA.Hsp70-7d	0.069	0.531	0.13
BnC.Hsp70-6c	BnC.Hsp70-6d	0.123	0.298	0.413
BnA.Hsp70-7a	BnA.Hsp70-7b	0.027	0.489	0.055
BnA.Hsp70-7a	BnA.Hsp70-7d	0.013	0.502	0.026
BnA.Hsp70-7a	BnC.Hsp70-7c	0.016	0.566	0.028
BnA.Hsp70-7b	BnC.Hsp70-7c	0.01	0.185	0.054
BnA.Hsp70-7b	BnA.Hsp70-7d	0.013	0.479	0.027
BnC.Hsp70-7c	BnA.Hsp70-7d	0.012	0.508	0.024
BnA.Hsp70-8a	BnC.Hsp70-8b	0.006	0.085	0.706
BnC.Hsp70-9a	BnA.Hsp70-9d	0.001	0.122	0.008
BnC.Hsp70-9a	BnC.Hsp70-9b	0.025	0.448	0.056
BnC.Hsp70-9a	BnA.Hsp70-9c	0.033	0.454	0.073
BnC.Hsp70-9b	BnA.Hsp70-9c	0.007	0.129	0.054
BnC.Hsp70-9b	BnA.Hsp70-9d	0.026	0.448	0.058
BnA.Hsp70-9c	BnA.Hsp70-9d	0.035	0.452	0.077
BnA.Hsp70-10a	BnC.Hsp70-10c	0.019	0.361	0.053
BnA.Hsp70-10a	BnA.Hsp70-10b	0.019	0.407	0.047
BnA.Hsp70-10a	BnC.Hsp70-10d	0.026	0.205	0.127
BnA.Hsp70-10b	BnC.Hsp70-10c	0.003	0.182	0.016
BnA.Hsp70-10b	BnC.Hsp70-10d	0.036	0.415	0.087
BnC.Hsp70-10c	BnC.Hsp70-10d	0.036	0.389	0.093
BnA.Hsp70-11a	BnC.Hsp70-11b	0	0.104	0
BnA.Hsp70-11a	BnA.Hsp70-12d	0.006	0.219	0.027
BnA.Hsp70-11a	BnC.Hsp70-11c	0.004	0.241	0.017
BnA.Hsp70-11a	BnA.Hsp70-12c	0.012	0.269	0.045
BnA.Hsp70-11a	BnC.Hsp70-12b	0.011	0.296	0.037
BnA.Hsp70-11a	BnC.Hsp70-12a	0.022	0.392	0.056
BnA.Hsp70-11a	BnA.Hsp70-12e	0.02	0.391	0.051
BnC.Hsp70-11b	BnA.Hsp70-12d	0.006	0.219	0.027
BnC.Hsp70-11b	BnC.Hsp70-11c	0.004	0.238	0.017
BnC.Hsp70-11b	BnC.Hsp70-12b	0.012	0.256	0.047
BnC.Hsp70-11b	BnA.Hsp70-12c	0.013	0.243	0.053
BnC.Hsp70-11b	BnC.Hsp70-12a	0.023	0.35	0.066
BnC.Hsp70-11b	BnA.Hsp70-12e	0.021	0.362	0.058
BnC.Hsp70-11c	BnA.Hsp70-12d	0.003	0.114	0.026
BnC.Hsp70-11c	BnC.Hsp70-12b	0.009	0.262	0.034
BnC.Hsp70-11c	BnA.Hsp70-12c	0.01	0.269	0.037
BnC.Hsp70-11c	BnC.Hsp70-12a	0.022	0.368	0.06
BnC.Hsp70-11c	BnA.Hsp70-12e	0.019	0.389	0.049
BnC.Hsp70-12a	BnA.Hsp70-12c	0.018	0.277	0.065
BnC.Hsp70-12a	BnC.Hsp70-12b	0.02	0.301	0.066
BnC.Hsp70-12a	BnA.Hsp70-12d	0.024	0.364	0.066
BnC.Hsp70-12a	BnA.Hsp70-12e	0.021	0.315	0.067
BnC.Hsp70-12b	BnA.Hsp70-12c	0.002	0.112	0.018
BnC.Hsp70-12b	BnA.Hsp70-12d	0.011	0.246	0.045
BnC.Hsp70-12b	BnA.Hsp70-12e	0.018	0.335	0.054
BnA.Hsp70-12c	BnA.Hsp70-12d	0.012	0.269	0.045
BnA.Hsp70-12c	BnA.Hsp70-12e	0.014	0.295	0.047
BnA.Hsp70-12d	BnA.Hsp70-12e	0.021	0.352	0.06
BnA.Hsp70-13a	BnC.Hsp70-13b	0.006	0.041	0.146
BnA.Hsp70-15a	BnC.Hsp70-15c	0.007	0.132	0.053
BnA.Hsp70-15a	BnA.Hsp70-15b	0.015	0.307	0.049
BnA.Hsp70-15a	BnC.Hsp70-15d	0.016	0.32	0.05
BnA.Hsp70-15b	BnC.Hsp70-15d	0.019	0.174	0.109
BnA.Hsp70-15b	BnC.Hsp70-15c	0.041	0.327	0.125
BnC.Hsp70-15c	BnC.Hsp70-15d	0.069	0.362	0.191
BnC.Hsp70-16a	BnA.Hsp70-16b	0.0083	0.1047	0.0793
BnA.Hsp70-17a	BnC.Hsp70-17b	0.0055	0.0534	0.103
BnA.Hsp70-17a	BnC.Hsp70-17c	0.033	0.3003	0.1099
BnA.Hsp70-17a	BnA.Hsp70-17d	0.0338	0.2983	0.1133
BnC.Hsp70-17b	BnA.Hsp70-17d	0.0343	0.2876	0.1193
BnC.Hsp70-17b	BnC.Hsp70-17c	0.0346	0.3146	0.101
BnC.Hsp70-17c	BnA.Hsp70-17d	0.0183	0.1176	0.1556
Mean		0.0235494	0.35573	0.0754989

## Sheet: B. rapa
Table S5 The Ka/Ks ratios for segmentally-duplicated BrHsp70 genes
Gene name	Gene name	ka	ks	ka/ks
BrHsp70-2a	BrHsp70-2b	0.006	0.31	0.019
BrHsp70-2a	BrHsp70-2f	0.037	0.118	0.314
BrHsp70-2b	BrHsp70-2f	0.056	0.445	0.126
BrHsp70-2c	BrHsp70-2d	0.003	0.187	0.016
BrHsp70-2c	BrHsp70-2e	0.016	0.574	0.028
BrHsp70-4a	BrHsp70-4b	0.009	1.005	0.009
BrHsp70-4a	BrHsp70-5b	0.117	1.353	0.086
BrHsp70-5a	BrHsp70-5b	0.027	0.73	0.037
BrHsp70-6a	BrHsp70-6b	0.034	0.467	0.073
BrHsp70-6a	BrHsp70-6c	0.023	0.509	0.045
BrHsp70-6b	BrHsp70-6c	0.027	0.494	0.055
BrHsp70-9a	BrHsp70-9b	0.037	0.46	0.08
BrHsp70-10a	BrHsp70-10b	0.021	0.377	0.056
BrHsp70-11	BrHsp70-12a	0.021	0.244	0.086
BrHsp70-11	BrHsp70-12b	0.018	0.358	0.05
BrHsp70-11	BrHsp70-12c	0.013	0.257	0.051
BrHsp70-12a	BrHsp70-12b	0.03	0.335	0.09
BrHsp70-12a	BrHsp70-12c	0.034	0.263	0.129
BrHsp70-12b	BrHsp70-12c	0.024	0.282	0.085
BrHsp70-15a	BrHsp70-15b	0.16	0.334	0.479
BrHsp70-17a	BrHsp70-17b	0.071	0.368	0.193
Mean		0.0373333	0.450952	0.100333

## Sheet: B. oleracea
Table S5 The Ka/Ks ratios for segmentally-duplicated BoHsp70 genes
Gene name	Gene name	ka	ks	ka/ks
BoHsp70-2a	BoHsp70-2b	0.005	0.147	0.034
BoHsp70-2a	BoHsp70-2c	0.024	0.806	0.03
BoHsp70-2a	BoHsp70-2d	0.027	0.865	0.031
BoHsp70-2b	BoHsp70-2c	0.023	0.831	0.028
BoHsp70-2b	BoHsp70-2d	0.026	0.87	0.03
BoHsp70-2c	BoHsp70-2d	0.009	0.547	0.016
BoHsp70-2c	BoHsp70-4	0.072	1.271	0.057
BoHsp70-2d	BoHsp70-4	0.073	1.676	0.044
BoHsp70-5a	BoHsp70-5b	0.025	0.673	0.037
BoHsp70-9a	BoHsp70-9b	0.027	0.479	0.056
BoHsp70-12a	BoHsp70-12b	0.013	0.302	0.043
BoHsp70-15a	BoHsp70-15b	0.019	0.296	0.064
BoHsp70-17a	BoHsp70-17b	0.035	0.305	0.115
Mean		0.0290769	0.697538	0.045
