# Supplementary material for: Genome-wide identification and characterization of the Hsp70 gene family in allopolyploid rapeseed (Brassica napus L.) compared with its diploid progenitors
Source: PeerJ. 2019 Aug 20;7:e7511. doi: 10.7717/peerj.7511 (PMC6707343; doi:10.7717/peerj.7511)
Supplement: Table S8 — All cis-acting elements were predicted using PlantCARE (http://bioinformatics.psb.ugent.be/webtools/plantcare/html/) online tool. [file peerj-07-7511-s010.xlsx]

## Sheet: B. napus
Table S6 Number of elements responsive to stresses and hormones in the promoter regions of BnHsp70 genes
	Hormone-relative elements									Stress-relative elements
	Abscisic acid	ABA and VP1	Auxin			MeJA	Ethylene	Gibberellin	Salicylic acid	Fungal	Heat	Chilling	Drought	Defense and stress	Anaeorobic	Anoxic	Wound	Sum
Gene name	ABRE	CE3	AUXRR-core	TGA-element	TGA-box	CGTCA-motif	ERE	P-box	TCA-element	Box-W1	HSE	LTR	MBS	TC-rich repeats	ARE	GC-motif	WUN-motif
BnC.Hsp70-2	1			2		3		2		2	1		2	1	3			17
BnA.Hsp70-4a				1		3	1				2		2	2	4		1	16
BnC.Hsp70-4b	1					1		1					2	3	5		1	14
BnA.Hsp70-4c						5	1	1	2	2	2		1	1	2		1	18
BnC.Hsp70-4d						5	1	1	1	2	5		1	1	1		1	19
BnC.Hsp70-5a								1			1	5	1	1	4			13
BnA.Hsp70-5b									3	1		1	2		4		1	12
BnC.Hsp70-5c	2			2			1		3				1		3	1		13
BnA.Hsp70-5d	4			2			1		1			1			2	2		13
BnC.Hsp70-6a	2		1			1			1		1		1	6	1			14
BnC.Hsp70-6b	2					3	1		1	2	1	1	2	2	1		1	17
BnC.Hsp70-6c	2					1		1		1	1	1	3	1	4		1	16
BnC.Hsp70-6d	1			1		4		1	1		1				3			12
BnA.Hsp70-7a			1	1		2							3	2	1		1	11
BnA.Hsp70-7b				1								1	2	5	1	1		11
BnC.Hsp70-7c				2					2		1		2	1	2	1		11
BnA.Hsp70-7d	1			3							1			1	1			7
BnA.Hsp70-8a	2					1			3		1		2	3	2		1	15
BnC.Hsp70-8b							1		1		1	1	1	3	5			13
BnC.Hsp70-9a	1				1	1		1	1	2	2		1	2		1		13
BnC.Hsp70-9b	1					1	1		1			1	2	1	1			9
BnA.Hsp70-9c	1					1	1					2	2	2	2			11
BnA.Hsp70-9d	1				1	1		1	2	1			1	1	1	1		11
BnA.Hsp70-10a				1		1						3	1		3			9
BnA.Hsp70-10b	1			4		3		1	1		1	1	2	2	4			20
BnC.Hsp70-10c	1			1					1		2	1		1	4			11
BnC.Hsp70-10d				3		2						1	1	1	2			10
BnA.Hsp70-11a	2			3			1	2	3		2	1	1		1		1	17
BnC.Hsp70-11b	3					2		1	2				1	3	1			13
BnC.Hsp70-11c			1			3			3	1		2		1	1			12
BnC.Hsp70-12a	2					2	1			2	3		2	4	1			17
BnC.Hsp70-12b	1			1		1				1	3	1	2	3	3		1	17
BnA.Hsp70-12c	2			1		2				1	4		1	1	2		1	15
BnA.Hsp70-12d			1			3			3			3		1	1	1		13
BnA.Hsp70-12e	2				1	3			1	1			2	3	1			14
BnA.Hsp70-13a	3			2		2	1		4			1			3	1		17
BnC.Hsp70-13b	8	1				2			2			2	2		1			18
BnA.Hsp70-15a						1		1					3	1	2			8
BnA.Hsp70-15b						1	2				1		1	3	1			9
BnC.Hsp70-15c				1					1				1	3	1			7
BnC.Hsp70-15d						2	2		1	2	2			1				10
BnC.Hsp70-16a				3		2	1	1	2		1		2	1	3			16
BnA.Hsp70-16b				2			1	1	2	1	1		1	1	4			14
BnA.Hsp70-17a	2		1			1							1	3	4			12
BnC.Hsp70-17b	2		1			2			1				1	1	2			10
BnC.Hsp70-17c	3								1	1	2	1	1	1			1	11
BnA.Hsp70-17d	2						1		2		1		1	1	2			10
Total	56	1	6	37	3	68	19	17	53	23	44	31	61	75	100	9	13

## Sheet: B. rapa
Table S6 Number of elements responsive to stresses and hormones in the promoter regions of BrHsp70 genes
	Hormone-relative elements									Stress-relative elements
	Abscisic acid	ABA and VP1	Auxin			MeJA	Ethylene	Gibberellin	Salicylic acid	Fungal	Heat	Chilling	Drought	Defense and stress	Anaeorobic	Anoxic	Wound	Sum
Gene name	ABRE	CE3	AUXRR-core	TGA-element	TGA-box	CGTCA-motif	ERE	P-box	TCA-element	Box-W1	HSE	LTR	MBS	TC-rich repeats	ARE	GC-motif	WUN-motif
BrHsp70-2a				1					2	4			3	1	5			16
BrHsp70-2b				1		1	1		2	1	3			2	1			12
BrHsp70-2c						1	1		1	1	3			3	2			12
BrHsp70-2d	1								1	1	1	2	2		6			14
BrHsp70-2e							1				2	6		1	2			12
BrHsp70-2f	1					1	1		3		1		2	2	4			15
BrHsp70-4a				1		3	1				2		2	2	4		1	16
BrHsp70-4b						4	1	1	2	2	2		1	1	2		1	17
BrHsp70-5a							1		2				1		1			5
BrHsp70-5b								1	1	1			2		2		1	8
BrHsp70-6a						1					1	1	1	6				10
BrHsp70-6b				1		3			2				1	1	1		1	10
BrHsp70-6c				2							2			1	1			6
BrHsp70-6d						2		1	1	1	1		2	1	1			10
BrHsp70-8						1			2		1			5	3			12
BrHsp70-9a	1						1					1	1	2	2			8
BrHsp70-9b	1				1	1		1	1	2			1	1	1	1		11
BrHsp70-10a				1		2						3	1		4			11
BrHsp70-10b	2			2							1	2	2	2	4			15
BrHsp70-11	2					1	1	2	3		1		1	1			1	13
BrHsp70-12a				1		2	2	1	1		5			1	3			16
BrHsp70-12b	2				1	3			2	1			2	3	1			15
BrHsp70-12c			1			3			4			4		1	1			14
BrHsp70-13	3			2		2	1		4			1			3	1		17
BrHsp70-15a				1				1			1	2	1	1	2			9
BrHsp70-15b							1		1		3	1	1	3	1			11
BrHsp70-16				2			1	1	2	1	1		1	1	4			14
BrHsp70-17a	2										1		1	2	3			9
BrHsp70-17b	2						1		2		1		1	2	2			11
Total	17	0	1	15	2	31	15	9	39	15	33	23	30	46	66	2	5

## Sheet: B. oleracea
Table S6 Number of elements responsive to stresses and hormones in the promoter regions of BoHsp70 genes
	Hormone-relative elements									Stress-relative elements
	Abscisic acid	ABA and VP1	Auxin			MeJA	Ethylene	Gibberellin	Salicylic acid	Fungal	Heat	Chilling	Drought	Defense and stress	Anaeorobic	Anoxic	Wound	Sum
Gene name	ABRE	CE3	AUXRR-core	TGA-element	TGA-box	CGTCA-motif	ERE	P-box	TCA-element	Box-W1	HSE	LTR	MBS	TC-rich repeats	ARE	GC-motif	WUN-motif
BoHsp70-2a			1			1			1	1			2	1	2			9
BoHsp70-2b						1	1			2			1	2	6			13
BoHsp70-2c	3									1	1							5
BoHsp70-2d	1	1				2			2	1	8	1	1	4				21
BoHsp70-4						3		1	2	1	5			1	1		1	15
BoHsp70-5a											1	5	1	1	3			11
BoHsp70-5b							1		2				2		3	1		9
BoHsp70-7										1			2	2	2	1		8
BoHsp70-8							1		2		1	1	1	3	5			14
BoHsp70-9a	1					2	1					1	2	1	1			9
BoHsp70-9b	1						1				2			1		1		6
BoHsp70-10	1			1					1		2	1		1	5			12
BoHsp70-12a	1			1		2				1	2	1		2	2			12
BoHsp70-12b			1			3			3	2		2		1	1			13
BoHsp70-13	8	1				2			2			2	2		1			18
BoHsp70-15a	1			1					1					3	1			7
BoHsp70-15b						1	2			1	2		3	3	2			14
BoHsp70-16				3		2	1	1	2		1		2	1	3			16
BoHsp70-17a	2					4							2		1			9
BoHsp70-17b	1					1	1		1		3	1	1	1	1			11
Total	20	2	2	6	0	24	9	2	19	11	28	15	22	28	40	3	1
