# Supplementary material for: Genome-wide identification and characterization of the Hsp70 gene family in allopolyploid rapeseed (Brassica napus L.) compared with its diploid progenitors
Source: PeerJ. 2019 Aug 20;7:e7511. doi: 10.7717/peerj.7511 (PMC6707343; doi:10.7717/peerj.7511)
Supplement: Table S9 — FPKM values were calculated by RSEM (Expectation-Maximization) tool to estimate the gene expression levels. BnC.Hsp70-6d and BrHsp70-6d were not detected gene expression data. [file peerj-07-7511-s011.xlsx]

## Sheet: B. napus
Table S7 FPKM value of B. napus Hsp70 genes in four major tissues
Gene name	Stem	Leaf	Flower	Silique
BnC.Hsp70-2	0.596667	26.5167	0.303333	0.306667
BnA.Hsp70-4a	12.2967	137.353	89.57	10.93
BnC.Hsp70-4b	15.2933	82.7633	73.8733	14.5567
BnA.Hsp70-4c	10.7367	141.467	65.2767	8.44
BnC.Hsp70-4d	7.28	114.133	72.55	8.23
BnC.Hsp70-5a	9.86667	19.9167	10.8567	6.90333
BnA.Hsp70-5b	5.58333	19.34	9.04	5.66333
BnC.Hsp70-5c	9.82333	9.65667	15.7767	9.76
BnA.Hsp70-5d	5.42	4.08	14.08	5.35
BnC.Hsp70-6a	11.7967	44.82	5.54	8.84
BnC.Hsp70-6b	57.87	132.787	26.0333	37.08
BnC.Hsp70-6c	0.01	0.01	0.0266667	0.0266667
BnC.Hsp70-6d	0.01	0.01	0.01	0.01
BnA.Hsp70-7a	4.95333	37.1467	2.30667	5.45333
BnA.Hsp70-7b	18.97	55.7967	12.4733	15.25
BnC.Hsp70-7c	40.6067	49.8567	31.3333	40.24
BnA.Hsp70-7d	51.9167	156.427	23.29	35.0167
BnA.Hsp70-8a	11.1	20.0867	5.17	9.19333
BnC.Hsp70-8b	5.04667	13.6833	2.52333	5.43
BnC.Hsp70-9a	29.8433	12.7933	21.5	22.0567
BnC.Hsp70-9b	14.46	8.12667	12.5767	14.16
BnA.Hsp70-9c	5.92	8.18	6.78667	9.23667
BnA.Hsp70-9d	26.34	13.2633	17.51	26.61
BnA.Hsp70-10a	14.1767	15.27	8.61	12.28
BnA.Hsp70-10b	18.0167	20.9633	18.4567	25.6933
BnC.Hsp70-10c	16.6	24.1267	20.59	20.1733
BnC.Hsp70-10d	2.19	3.09	1.44333	2.33
BnA.Hsp70-11a	100.683	32.03	24.23	64.9567
BnC.Hsp70-11b	66.0367	24.35	24.1233	66.79
BnC.Hsp70-11c	31.3333	19.5467	17.1333	30.4933
BnC.Hsp70-12a	82.2833	38.3467	28.91	90.0767
BnC.Hsp70-12b	31.0733	17.41	13.0733	32.9367
BnA.Hsp70-12c	37.7433	24.42	12.7333	45.4067
BnA.Hsp70-12d	22.2867	16.9733	12.97	22.07
BnA.Hsp70-12e	0.103333	0.01	0.01	0.45
BnA.Hsp70-13a	0.01	0.18	0.01	0.01
BnC.Hsp70-13b	0.01	0.0933333	0.01	0.01
BnA.Hsp70-15a	53.4433	26.1567	27.7067	39.6767
BnA.Hsp70-15b	47.0633	49.3167	42.4833	39.7333
BnC.Hsp70-15c	56.35	35.7833	30.78	36.3933
BnC.Hsp70-15d	43.2533	35.2967	41.5333	26.7767
BnC.Hsp70-16a	9.51667	5.58333	11.4433	8.71667
BnA.Hsp70-16b	19.11	8.68	24.85	17.6133
BnA.Hsp70-17a	28.9333	16.9767	13.84	28.0233
BnC.Hsp70-17b	32.6267	12.3467	12.2	34.8433
BnC.Hsp70-17c	8.43667	5.27667	2.2	7.40333
BnA.Hsp70-17d	1.63333	1.13333	0.88	0.886667

## Sheet: B. rapa
Table S7 FPKM value of B. rapa Hsp70 genes in four major tissues
Gene name	Stem	Leaf	Flower	Silique
BrHsp70-2a	859.123	1037.06	1113.56	1176.31
BrHsp70-2b	226.65	271.357	311.873	275.733
BrHsp70-2c	69.1967	91.64	156.217	166.707
BrHsp70-2d	124.593	74.4767	189.96	153.967
BrHsp70-2e	249.03	80.4467	237.257	215.313
BrHsp70-2f	521.637	631.01	453.893	475.113
BrHsp70-4a	628.607	263.383	1248.47	991.337
BrHsp70-4b	497.093	255.757	956.417	556.55
BrHsp70-5a	36.6867	23.0667	39.14	60.56
BrHsp70-5b	34.0667	48.7867	31.2167	53.69
BrHsp70-6a	56.09	24.05	46.2933	50.8933
BrHsp70-6b	41.5367	77.5	35.6733	58.1433
BrHsp70-6c	126.553	151.183	100.957	148.387
BrHsp70-6d	0.01	0.01	0.01	0.01
BrHsp70-8	11.1567	33.0033	14.9533	27.2633
BrHsp70-9a	13.4733	16.04	28.3833	26.06
BrHsp70-9b	13.0867	10.9967	29.1567	22.47
BrHsp70-10a	24.83	41.52	49.54	45.0833
BrHsp70-10b	32.04	39.8467	97.5633	89.41
BrHsp70-11	175.44	46.0267	296.333	446.103
BrHsp70-12a	88.3067	37.7267	298.683	423.84
BrHsp70-12b	7.58667	5.86333	21.6667	30.2767
BrHsp70-12c	20.6267	14.4567	53.96	88.46
BrHsp70-13	0.216667	0.16	0.01	0.01
BrHsp70-15a	131.503	100.293	144.283	181.733
BrHsp70-15b	69.4867	54.3667	65.9667	87.64
BrHsp70-16	23.6567	15.61	40.4567	27.73
BrHsp70-17a	43.6133	23.9467	68.26	108.25
BrHsp70-17b	3.12333	2.24667	3.35	5.72333

## Sheet: B. oleracea
Table S7 FPKM value of B. oleracea Hsp70 genes in four major tissues
Gene name	Stem	Leaf	Flower	Silique
BoHsp70-2a	167.497	367.09	168.45	204.02
BoHsp70-2b	232.507	532.793	249.753	322.197
BoHsp70-2c	170.24	353.787	209.797	229.663
BoHsp70-2d	115.067	435.96	169.077	113.74
BoHsp70-4	131.46	408.557	126.753	7.25333
BoHsp70-5a	48.7467	122.23	17.3	15.6333
BoHsp70-5b	29.9933	307.013	36.6367	17.44
BoHsp70-7	159.84	295.643	150.69	160.97
BoHsp70-8	36.48	29.1833	9.23	19.36
BoHsp70-9a	20.1967	22.99	81.48	38.8233
BoHsp70-9b	41.7367	44.3133	107.413	85.99
BoHsp70-10	73.14	85.75	77.0767	55.7533
BoHsp70-12a	294.633	237.793	147.733	254.047
BoHsp70-12b	112.523	103.567	70.8267	94.0667
BoHsp70-13	0.01	0.03	0.01	0.01
BoHsp70-15a	109.123	76.2933	113.797	134.343
BoHsp70-15b	120.917	123.577	98.42	107.433
BoHsp70-16	16.8367	16.9933	31.1733	36.2367
BoHsp70-17a	60.8333	48.6833	27.66	60.9633
BoHsp70-17b	11.63	8.73	5.26667	9.61667
